# Supplementary material
Source: PubMed Central journal article supplement (PMC2852514)
Supplement: 12154_2009_31_MOESM1_ESM.pdf [file 12154_2009_31_MOESM1_ESM.pdf]

## **Supplementary material**

### **Glycosylated cell-penetrating peptides and their conjugates to a proapoptotic peptide: preparation by click chemistry and cell viability studies**

Laurence Dutot<sup>a+</sup>, Pascaline Lécorché<sup>a+</sup>, Fabienne Burlina<sup>a</sup>, Rodrigue Marquant<sup>a</sup>, Vanessa Point<sup>a</sup>, Sandrine Sagan<sup>a</sup>, Gérard Chassaing<sup>a</sup>, Jean-Maurice Mallet<sup>b</sup>, Solange Lavielle<sup>\*a</sup>

a UPMCParis06 - CNRS - ENS, UMR 7203 “Laboratoire des BioMolécules” and FR2769 “Chimie Moléculaire”, Université Pierre et Marie Curie, 4 place Jussieu, 75005 Paris, France.  
Fax: +33 1 44 27 71 50; Tel: +33 1 44 27 31 50; E-mail: solange.lavielle@upmc.fr.

b ENS - CNRS - UPMCParis06, UMR 7203 “Laboratoires des BioMolécules” and “Département de Chimie”, 24, Rue Lhomond 75005 Paris, France.

+ equal contribution

**Table 1.** Conditions for the click reaction on the model peptide: Ac-Arg-Pra-Arg-Ahx-Rink amide-resin.

| Cu salt <sup>[a]</sup><br>(equivalent)                 | Compound 2 <sup>[c]</sup><br>equivalent | DIEA,<br>equivalent | Time<br>Hours <sup>[d]</sup> | Conversion <sup>[e]</sup> |
|--------------------------------------------------------|-----------------------------------------|---------------------|------------------------------|---------------------------|
| Cu(OAc) <sub>2</sub> (40)<br>Pyridine <sup>[b]</sup>   | 20                                      | 50                  | 15                           | Complete                  |
| Cu(OAc) <sub>2</sub> (20)<br>Pyridine <sup>[b]</sup>   | 10                                      | 25                  | 15                           | Complete                  |
| Cu(OAc) <sub>2</sub> (10)<br>Pyridine <sup>[b]</sup>   | 5                                       | 12.5                | 15                           | Complete                  |
| Cu(OAc) <sub>2</sub><br>(4)<br>Pyridine <sup>[b]</sup> | 2                                       | 5                   | 15                           | Complete                  |
| Cu(OAc) <sub>2</sub><br>(4)<br>Pyridine <sup>[b]</sup> | 2                                       | 5                   | 5                            | Complete                  |
| CuI<br>(2)<br>Lutidine <sup>[b]</sup>                  | 2                                       | 4                   | 5                            | Complete                  |
| CuI<br>(2)<br>Piperidine <sup>[b]</sup>                | 2                                       | 4                   | 5                            | Complete                  |

[a] Ascorbic acid in a 1:2 ratio with Cu(OAc)<sub>2</sub> and a 1:1 ratio with CuI salt. [b] 30% pyridine, lutidine or piperidine in dimethylformamide. [c] Compound 2: equivalents calculated from the amino-substitution of the resin used, thus for a total coupling of the propargylglycine residue. [d] Overnight (15h) or 5h coupling at room temperature. [e] The conversion was monitored after cleavage of the peptidyl-resin and RP-HPLC analysis; the 5 hours coupling was considered as optimal conditions for this model peptide and for larger peptides.

**Fig 1.** Azido-propyl rhodamine 9.

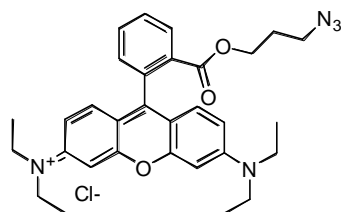

**Table 2.** Characterization of the different peptides **8 – 24**.

| Peptides                                                                          | Retention time, min <sup>[a]</sup> | Yield (%) <sup>[b]</sup> | MALDI-TOF MS <sup>[c]</sup>         |
|-----------------------------------------------------------------------------------|------------------------------------|--------------------------|-------------------------------------|
| <b>8</b> - Ac-R-[Pra-Gal(OAc)]-R-Ahx-NH <sub>2</sub>                              | 10.0 (0-95%)                       | n.d.                     | [MH] <sup>+</sup> 953.48 (953.48)   |
| <b>10</b> - (R6/W3)S-S <i>t</i> Bu                                                | 17.0 (15-55%)                      | 14                       | [MH] <sup>+</sup> 1744.94 (1744.93) |
| <b>11</b> - (R6/W3)-SH                                                            | 11.7 (15-55%)                      | 87 <sup>[d]</sup>        | [MH] <sup>+</sup> 1658.00 (1657.90) |
| <b>12</b> - (R6/W2)-Pra-S-S <i>t</i> Bu                                           | 12.5 (15-55%)                      | n.d.                     | [MH] <sup>+</sup> 1654.82 (1654.89) |
| <b>13</b> - (R6/W1)-Pra <sub>2</sub> -S-S <i>t</i> Bu                             | 12.9 (15-55%)                      | n.d.                     | [MH] <sup>+</sup> 1563.56 (1563.85) |
| <b>14</b> - (R6/W0)-Pra <sub>3</sub> -S-S <i>t</i> Bu                             | 9.9 (15-55%)                       | n.d.                     | [MH] <sup>+</sup> 1472.80 (1472.81) |
| <b>15</b> - (R6/W2)-[Pra-Gal(OAc)]S-S <i>t</i> Bu                                 | 14.5 (15-55%)                      | 3                        | [MH] <sup>+</sup> 2027.96 (2028.00) |
| <b>16</b> - (R6/W2)-[Pra-Gal(OH)]-SH                                              | 8.2 (15-55%)                       | 70 <sup>[d]</sup>        | [MH] <sup>+</sup> 1771.95 (1771.93) |
| <b>17</b> - (R6/W1)-[Pra-Gal(OAc)] <sub>2</sub> S-S <i>t</i> Bu                   | 18.0 (10-60%)                      | 4.5                      | [MH] <sup>+</sup> 2309.83 (2310.07) |
| <b>18</b> - (R6/W0)-[Pra-Gal(OAc)] <sub>3</sub> S-S <i>t</i> Bu                   | 18.2 (10-60%)                      | 7.5                      | [MH] <sup>+</sup> 2591.87 (2592.14) |
| <b>19</b> - (R6/W0)-[Pra-Gal(OH)] <sub>3</sub> -SH                                | 8.0 (0-55%)                        | 38 <sup>[d]</sup>        | [MH] <sup>+</sup> 2000.15 (1999.98) |
| <b>20</b> - (R6/W2)-[Pra-Gal(CH <sub>2</sub> ) <sub>3</sub> (OAc)]S-S <i>t</i> Bu | 14.5 (15-55%)                      | 4.8                      | [MH] <sup>+</sup> 2085.92 (2086.04) |
| <b>21</b> - (R6/W2)-[Pra-Gal(CH <sub>2</sub> ) <sub>3</sub> (OBz)]S-S <i>t</i> Bu | 24.0 (15-55%)                      | 2.3                      | [MH] <sup>+</sup> 2334.38 (2334.11) |
| <b>22</b> - (R6/W2)-[Pra-Gal(CH <sub>2</sub> ) <sub>3</sub> (OH)]S-S <i>t</i> Bu  | 9.7 (15-55%)                       | 3.4                      | [MH] <sup>+</sup> 1917.59 (1918.00) |
| <b>23</b> - (R6/W2)-[Pra-Gal(CH <sub>2</sub> ) <sub>3</sub> (OH)]-SH              | 7.0 (15-55%)                       | 46 <sup>[d]</sup>        | [MH] <sup>+</sup> 1829.71 (1829.97) |
| <b>24</b> - (R6/W2)-[Pra-Gal(CH <sub>2</sub> ) <sub>3</sub> (OAc)]-SH             | 10.5 (20-60%)                      | 80 <sup>[d]</sup>        | [MH] <sup>+</sup> 1997.60 (1998.00) |

[a] Linear gradient (30 min) of acetonitrile in 0.1% TFA. [b] Calculated from MBHA resin substitution: click-chemistry, cleavage, deprotection of galactose, (depending of the sequence), purification. [c] Given as found and (*calculated*). [d] Yield including deacetylation, if necessary, and disulfide reduction with DTT.

**Table 3.** Characterization of the glycopeptides conjugated to the KLAK peptides.

DTT was eliminated by rapid HPLC purification to isolate the thiol peptides, which were then immediately mixed to the KLAK peptide **25**. After completion of the coupling the final conjugates were purified by HPLC; their retention times different from those of the corresponding initial peptides attested the disappearance of the starting materials. The  $MH^+$  ion of the glycoconjugates **27** and **28** was not observed on the MALDI-TOF mass spectra, as we already experienced with some dissymmetric disulfide-brigded peptides. Fragments coming from the cleavage of the S-S bond were observed, the isotopic distribution of these peaks and the presence of ( $\pm 32$ ,  $\pm 34$  peaks) signed the presence of the expected products [1].

| Number - Peptides                                                                                                                                                                                                                                                                                                                                                                                                                                                        | Retention time, min <sup>[a]</sup> | Yield (%) <sup>[b]</sup> | MALDI-TOF MS <sup>[c]</sup>                                                                                                                                                |
|--------------------------------------------------------------------------------------------------------------------------------------------------------------------------------------------------------------------------------------------------------------------------------------------------------------------------------------------------------------------------------------------------------------------------------------------------------------------------|------------------------------------|--------------------------|----------------------------------------------------------------------------------------------------------------------------------------------------------------------------|
| <b>26</b> - (R6/W3)S-S-KLAK                                                                                                                                                                                                                                                                                                                                                                                                                                              | 20.0<br>(15-35%)                   | 46                       | $[MH]^+$ [(R6/W3)S-S-KLAKH] <sup>+</sup><br>3775.28 (3775.18)                                                                                                              |
| <b>27</b> - (R/6W2)-[Pra-Gal(OH)]S-S-KLAK                                                                                                                                                                                                                                                                                                                                                                                                                                | 14.0<br>(15-55%)                   | 28                       | $[MH]^+$ [(R6/W2)-[Pra-Gal(OH)]-SHH] <sup>+</sup> 1771.91 (1771.93)<br>$[MH]^+$ [KLAK-SHNa] <sup>+</sup> 2133.85 (2134.24) <sup>[d]</sup>                                  |
| <b>28</b> - (R6/W2)-[Pra-Gal(CH <sub>2</sub> ) <sub>3</sub> (OH)]S-S-KLAK                                                                                                                                                                                                                                                                                                                                                                                                | 14.0<br>(15-55%)                   | 33                       | $[MH]^+$ [(R6/W2)-[Pra-Gal(CH <sub>2</sub> ) <sub>3</sub> (OH)]-SHH] <sup>+</sup> 1829.73 (1829.96)<br>$[MNa]^+$ [KLAK-SHNa] <sup>+</sup> 2134.03 (2134.24) <sup>[d]</sup> |
| <b>29</b> - (R6/W2)-[Pra-Gal(CH <sub>2</sub> ) <sub>3</sub> (OAc)]S-S-KLAK                                                                                                                                                                                                                                                                                                                                                                                               | 13.5<br>(20-60%)                   | 22                       | $[MH]^+$ [(R6/W2)-[Pra-Gal(CH <sub>2</sub> ) <sub>3</sub> (OAc)]S-S-KLAKH] <sup>+</sup><br>4107.11 (4107.22)                                                               |
| <b>30</b> - (R6/W0)-[Pra-Gal(OH)] <sub>3</sub> S-S-KLAK                                                                                                                                                                                                                                                                                                                                                                                                                  | 19.5<br>(0-55%)                    | 72                       | $[MH]^+$ [(R6/W0)-[Pra-Gal(OH)] <sub>3</sub> S-S-KLAKH] <sup>+</sup> 4109.92 (4109.20)                                                                                     |
| [a] Linear acetonitrile (0.1% TFA) gradient (in 30 min) in 0.1% TFA expressed as (% acetonitrile). [b] Coupling with the KLAK cargo. [c] Given as found ( <i>calculated</i> ), respectively. [d] All these dissymmetric disulfide-bonded peptides are cleaved during the MALDI-TOF MS procedures; the major peak corresponding to the $[MH]^+$ or $[MNa]^+$ of each monomeric peptide, even though these monomeric peptides are not detectable in the HPLC chromatogram. |                                    |                          |                                                                                                                                                                            |

1. Schnaible V, Wefing S, Resemann A, Suckau D, Bucker A, Wolf-Kummeth S, Hoffmann D (2002) Anal Chem 74:4980-4988.
